# Supplementary material for: Two neuronal peptides encoded from a single transcript regulate mitochondrial complex III in Drosophila
Source: eLife. 2022 Nov 8;11:e82709. doi: 10.7554/eLife.82709 (PMC9681215; doi:10.7554/eLife.82709)
Supplement: Supplementary file 2. [file elife-82709-supp2.xlsx]

## Sheet: Sheet1
Supplemental File 2
Name	Sequence	Description
JB2578_CG3242_transcript_F	AATCGAACAGCTGATTGCTG	PCR primers to amplify sloth1-2 genomic or transcript region
JB2579_CG3242_transcript_R	CTTAAATAGCTTTAGTCACCAATAACTTG	PCR primers to amplify sloth1-2 genomic or transcript region
JB749_MT-Rluc_backboneF	ATGACTTCGAAAGTTTATGATC	Cloning pMT-sloth1-Rluc
JB750_MT-Rluc_backboneR	GAATTCCCCTTTAGTTGCAC	Cloning pMT-sloth1-RLuc
JB751_CG3242_5'UTR_overlapMTRluc_F	gtgcaactaaaggggaattcAATCGAACAGCTGATTGC	Cloning pMT-sloth1-RLuc
JB752_CG3242_5'UTR_overlapMTRluc_R	tcataaactttcgaagtcatTTTGCTTAGTTGGTGTTATTC	Cloning pMT-sloth1-RLuc
JB753_CG32_SDM_ATG_TTG_F	ctgaaaacacTTGAGTCCGTACAGCGGATC	Cloning pMT-sloth1-RLuc derivatives by SDM
JB754_CG32_SDM_ATG_TTG_R	acggactcaaGTGTTTTCAGCCGGCGGTTATATAATTC	Cloning pMT-sloth1-RLuc derivatives by SDM
JB755_CG32_SDM_ATG_del_F	ctgaaaacacAGTCCGTACAGCGGATC	Cloning pMT-sloth1-RLuc derivatives by SDM
JB756_CG32_SDM_ATG_del_R	acggactGTGTTTTCAGCCGGCGGTTATATAATTC	Cloning pMT-sloth1-RLuc derivatives by SDM
JB757_CD32_SDM_kozak_GTGT_F	ctgaaagtgtATGAGTCCGTACAGCGGATC	Cloning pMT-sloth1-RLuc derivatives by SDM
JB758_CD32_SDM_kozak_GTGT_R	acggactcatACACTTTCAGCCGGCGGTTATATAATTC	Cloning pMT-sloth1-RLuc derivatives by SDM
JB759_CD32_SDM_kozak_CAAA_F	ctgaaacaaaATGAGTCCGTACAGCGGATC	Cloning pMT-sloth1-RLuc derivatives by SDM
JB760_CD32_SDM_kozak_CAAA_R	acggactcatTTTGTTTCAGCCGGCGGTTATATAATTC	Cloning pMT-sloth1-RLuc derivatives by SDM
JB773_CG42_SDM_kozak_GTGT_F	accaactaagGTGTATGACTTCGAAAGTTTATGATCCAG	Cloning pMT-sloth1-RLuc derivatives by SDM
JB774_CG42_SDM_kozak_GTGT_R	tcgaagtcatACACCTTAGTTGGTGTTATTCGC	Cloning pMT-sloth1-RLuc derivatives by SDM
JB567_CG32736_shRNA3_top	ctagcagtGCCGCGAATAACACCAACTAAtagttatattcaagcataTTAGTTGGTGTTATTCGCGGCgcg	Oligos annealed and ligated into pValium20 for shRNA expression
JB568_CG32736_shRNA3_bot	aattcgcGCCGCGAATAACACCAACTAAtatgcttgaatataactaTTAGTTGGTGTTATTCGCGGCactg	Oligos annealed and ligated into pValium20 for shRNA expression
JB572_CG32736gRNAdKO_F	TATATAGGAAAGATATCCGGGTGAACTTCgCGACGCACGGATCCGCTGTAGTTTTAGAGCTAGAAATAGCAAG	to construct pCFD4-sloth1 (aka JAB203)
JB573_CG32736gRNAdKO_R	ATTTTAACTTGCTATTTCTAGCTCTAAAACGGAAAGAAGCGCTTCGGTGTcGACGTTAAATTGAAAATAGGTC	to construct pCFD4-sloth1 (aka JAB203)
GP01169_F	TATATAGGAAAGATATCCGGGTGAACTTCGATGCCCGCCGGAGTTTCCTGGTTTTAGAGCTAGAAATAGCAAG	to construct pCFD4-sloth2 (aka GP01169)
GP01169_R	ATTTTAACTTGCTATTTCTAGCTCTAAAACAGGAATTTCAGGTACTGGCCGACGTTAAATTGAAAATAGGTC	to construct pCFD4-sloth2 (aka GP01169)
JB576_CG32736_CG42308gRNAdel1_F	TATATAGGAAAGATATCCGGGTGAACTTCGCGGTTATATAATTCCGTGTGTTTTAGAGCTAGAAATAGCAAG	to construct pCFD4-sloth1-sloth2 (aka JAB205, for dKO)
JB577_CG32736_CG42308gRNAdel1_R	ATTTTAACTTGCTATTTCTAGCTCTAAAACATAACTTGTCTAGTACACAGcGACGTTAAATTGAAAATAGGTC	to construct pCFD4-sloth1-sloth2 (aka JAB205, for dKO)
JB628_CG32-42_LH_EcoRI_F	cccttcgctgaagcaggtggGCCTCGTTGTTGGTGTAC	to amplify LHA
JB634_CG32-42_LH_Gal4SV40_R	gtagcttcatggtgTGTTGGTTTCGCCAATTTTAAG	to amplify LHA
JB635_CG32-42_Gal4SV40_LH_F	gaaaccaacacaccATGAAGCTACTGTCTTCTATC	to amplify Gal4-SV40
JB636_CG32-42_Gal4SV40_loxP_R	acgaagttatAGACATGATAAGATACATTGATG	to amplify Gal4-SV40
JB637_CG32-42_loxP_Gal4SV40_F	tatcatgtctATAACTTCGTATAATGTATGCTATAC	to amplify loxP-RFP-loxP
JB631_CG32-42_loxP_RH_R	gtcaccaataATAACTTCGTATAGCATACATTATACGAAGTTATACC	to amplify loxP-RFP-loxP
JB632_CG32-42_RH_loxP_F	acgaagttatTATTGGTGACTAAAGCTATTTAAGTG	to amplify RHA
JB633_CG32-42_RH_XhoI_R	actcgattgacggaagagccCTTCAGGGGATCAAGGAAC	to amplify RHA
JB265_Gibson_pEntr_1F	AAGGGTGGGCGCGCCGAC	to amplify pEntr backbone
JB266_Gibson_pEntr_1R	GGTGAAGGGGGCGGCCGC	to amplify pEntr backbone
JB517_CG32736_pEntr_F	ccgcggccgcccccttcaccATGAGTCCGTACAGCGGATC	to construct pEntr_sloth1
JB518_CG32736_pEntr_R	gggtcggcgcgcccacccttTTAGTTGGTGTTATTCGCGG	to construct pEntr_sloth1
JB519_CG32736_nostop_pEntr_R	gggtcggcgcgcccacccttGTTGGTGTTATTCGCGGCT	to construct pEntr_sloth1
JB404_CG42308_pEntr_F	ccgcggccgcccccttcaccATGCCCGCCGGAGTTTCC	to construct pEntr_sloth2
JB405_CG42308_pEntr_R	gggtcggcgcgcccacccttTTATGCAGATTCCGGTGGC	to construct pEntr_sloth2
JB509_CG42308_nostop_pEntr_R	gggtcggcgcgcccacccttTGCAGATTCCGGTGGCTT	to construct pEntr_sloth2
JB742_hSMIM4_gBlock (incorrect reverse seq)	ccgcggccgcccccttcaccATGTTTACAAGGGCACAAGTTCGCCGGATACTGCAACGAGTACCAGGTAAACAGCGCTTTGGCATCTATCGCTTCCTGCCATTCTTTTTTGTACTCGGCGGTACTATGGAGTGGATAATGATTAAAGTTCGAGTGGGCCAGGAGACATTCTACGATGTCTATAGGCGAAAAGCTAGTGAACGCCAGTATCAAAGGCGATTGGAAGACGAGgggtcggcgcgcccaccctt	to construct pEntr_hSMIM4
JB732_hSMIM4_pEntr_F	ccgcggccgcccccttcaccATGTTTACAAGGGCACAAGTTC	to construct pEntr_hSMIM4
JB733_hSMIM4_stop_pEntr_R	gggtcggcgcgcccacccttctattaCTCGTCTTCCAATCGCCTT	to construct pEntr_hSMIM4
JB743_hSMIM4_nostop_pEntr_R	gggtcggcgcgcccacccttCTCGTCTTCCAATCGCCTT	to construct pEntr_hSMIM4
JB526_hC12orf73_gBlock	CCGCGGCCGCCCCCTTcaccATGCCCGCGGGCGTGCCCATGTCCACCTACCTGAAAATGTTCGCAGCCAGTCTCCTGGCCATGTGCGCAGGGGCAGAAGTGGTGCACAGGTACTACCGACCGGACCTGACAATACCTGAAATTCCACCAAAGCGTGGAGAACTCAAAACGGAGCTTTTGGGACTGAAAGAAAGAAAACACAAACCTCAAGTTTCTCAACAGGAGGAACTTAAATAAAAGGGTGGGCGCGCCGACCC	to construct pEntr_hC12orf73
JB548_entr_c12orf73_nostop_R	gcccacccttTTTAAGTTCCTCCTGTTGAG	to construct pEntr_hC12orf73
JB549_entr_c12orf73_nostop_F	ggaacttaaaAAGGGTGGGCGCGCCGAC	to construct pEntr_hC12orf73
JB725_CG3242_genomic_pEntr_F	ccgcggccgcccccttcaccTCATTAGCGATGACAGCG	to construct pEntr_sloth1-sloth2 genomic
JB726_CG3242_genomic_pEntr_R	gggtcggcgcgcccacccttAAACGTGGCGTCTTTTGAATG	to construct pEntr_sloth1-sloth2 genomic
JB727_CG3242_transcript_pEntr_F	ccgcggccgcccccttcaccAATCGAACAGCTGATTGCTG	to construct pEntr_sloth1-sloth2 transcript
JB728_CG3242_transcript_pEntr_R	gggtcggcgcgcccacccttCTTAAATAGCTTTAGTCACCAATAACTTG	to construct pEntr_sloth1-sloth2 transcript
JB761_pEntr_genomicCG32_CG42del_F	actaagcaaaCACTGTGTACTAGACAAGTTATTGGTG	to construct pEntr_sloth1-sloth2 genomic derivatives
JB762_pEntr_genomicCG32_CG42del_R	gtacacagtgTTTGCTTAGTTGGTGTTATTCG	to construct pEntr_sloth1-sloth2 genomic derivatives
JB763_pEntr_genomicCG32del_CG42_F	ctgaaaacacGCAAAATGCCCGCCGGAG	to construct pEntr_sloth1-sloth2 genomic derivatives
JB764_pEntr_genomicCG32del_CG42_R	ggcattttgcGTGTTTTCAGCCGGCGGTTATATAATTC	to construct pEntr_sloth1-sloth2 genomic derivatives
JB533_PD43265F	GAAAGAAGCGCTTCGGTGTC	qPCR primers for sloth1
JB534_PD43265R	TCCACGTAGTTCTTCGCCTG	qPCR primers for sloth1
JB540_PD43573F	AGGACTTGCGCGTCTACATC	qPCR primers for sloth2
JB539_PD43573R	GATCCACCTGTGTGCTGTGT	qPCR primers for sloth2
JB713_Rp49_F	ATCGGTTACGGATCGAACAA	qPCR primers for Rp49
JB714_Rp49_R	GACAATCTCCTTGCGCTTCT	qPCR primers for Rp49
JB717_Gapdh_F	CCAATGTCTCCGTTGTGGA	qPCR primers for Gapdh
JB718_Gapdh_R	TCGGTGTAGCCCAGGATT	qPCR primers for Gapdh
JB1110_CG32736_indel_1F	CCTTAAAATTGGCGAAACCA	PCR primers to genotype and sequence sloth1-KO fly lines and S2R+ cell lines
JB1111_CG32736_indel_1R	TAAAAAGAAGAGCGGCAGGA	PCR primers to genotype and sequence sloth1-KO fly lines and S2R+ cell lines
JB1114_CG42308_indel_1F	CGCGAATAACACCAACTAAGC	PCR primers to genotype and sequence sloth2-KO fly lines and S2R+ cell lines
JB1115_CG42308_indel_1R	ATGTAGACGCGCAAGTCCTC	PCR primers to genotype and sequence sloth2-KO fly lines and S2R+ cell lines
JB580_CG32736_CG42308_geno_1F	gagcagtcgccgaaatagtc	PCR primers to genotype and sequence dKO fly lines and S2R+ cell lines
JB587_CG32736_CG42308_geno_4R	tgaaaccctttccctgtcac	PCR primers to genotype and sequence dKO fly lines and S2R+ cell lines
JB787_CG3242_LHA_F	tcgaaaagttgtgcctgatg	PCR primers to genotype Gal4-KI flies (left homology region)
JB662_Gal4seq1R	agcggagaccttttggtttt	PCR primers to genotype Gal4-KI flies (left homology region)
JB659_3P3dsred_seq1F	ACTCCAAGCTGGACATCACC	PCR primers to genotype Gal4-KI flies (right homology region)
JB790_CG3242_RHA_R	cgatgagccggctataaaaa	PCR primers to genotype Gal4-KI flies (right homology region)
