# Supplementary material for: Two neuronal peptides encoded from a single transcript regulate mitochondrial complex III in Drosophila
Source: eLife. 2022 Nov 8;11:e82709. doi: 10.7554/eLife.82709 (PMC9681215; doi:10.7554/eLife.82709)
Supplement: Supplementary file 3. [file elife-82709-supp3.xlsx]

## Sheet: gateway plamids
Supplemental File 3
pEntr plasmid	Expression plasmid	Final plasmid name	Alternative name	Fly Insertion site
pEntr_sloth1_stop	pWalium10-roe	pWalium10-sloth1	UAS-sloth1	attP2
pEntr_sloth2_stop	pWalium10-roe	pWalium10-sloth2	UAS-sloth2	attP2
pEntr_sloth2_stop	pValium10-roe	pValium10-sloth2	UAS-sloth2	attP40
pEntr_hSMIM4_stop	pWalium10-roe	pWalium10-hSMIM4	UAS-hSMIM4	attP2
pEntr_hC12orf73_stop	pWalium10-roe	pWalium10-hC12orf73	UAS-hC12orf73	attP2
pEntr_sloth1-sloth2 transcript	pWalium10-roe	pWalium10-sloth1-sloth2 transcript	UAS-sloth1-sloth2	attP2
pEntr_sloth1-sloth2 genomic	pBID-G	pBID-{sloth1-sloth2}	{sloth1-sloth2}	attP40
pEntr_Δsloth1-sloth2 genomic	pBID-G	pBID-{Δsloth1-sloth2}	{Δsloth1-sloth2}	attP40
pEntr_sloth1-Δsloth2 genomic	pBID-G	pBID-{sloth1-Δsloth2}	{sloth1-Δsloth2}	attP40
pEntr_BFP_nostop	pAWF	Act-BFP-FLAG
pEntr_sloth1_nostop	pAWF	Act-sloth1-FLAG
pEntr_sloth2_nostop	pAWF	Act-sloth2-FLAG
pEntr_BFP_nostop	pMK33-GW-SBP	pMK33-BFP-SBP	MT-BFP-SBP
pEntr_sloth1_nostop	pMK33-GW-SBP	pMK33-sloth1-SBP	MT-sloth1-SBP
pEntr_sloth2_nostop	pMK33-GW-SBP	pMK33-sloth2-SBP	MT-sloth2-SBP
pEntr_BFP_nostop	pAWH	Act-BFP-HA
pEntr_sloth1_nostop	pAWH	Act-sloth1-HA
pEntr_sloth2_nostop	pAWH	Act-sloth2-HA
pEntr_RFeSP	pAWH	Act-RFeSP-HA
pEntr_CG10075	pAWH	Act-CG10075-HA
pEntr_sloth1-sloth2 transcript	pMK33-GW	pMK33-sloth1-sloth2 transcript	MT-sloth1/2
